# Supplementary material for: The antinuclear antibody HEp-2 indirect immunofluorescence assay: a survey of laboratory performance, pattern recognition and interpretation
Source: Springer Nature journal article supplement (doi:10.1186/s13317-020-00146-w), 2021-02-27
Supplement: MOESM1 [file 18911112]

**Additional File 1. Participating clinical laboratories and *in vitro* diagnostic manufacturers**

| <b>Participant Group</b>                               | <b>Name of Rater (Participant), City and Country</b>                |
|--------------------------------------------------------|---------------------------------------------------------------------|
| <b>Clinical Laboratories (CL)</b>                      | Ascension, Tulsa, Oklahoma, USA                                     |
|                                                        | LabCorp, Dublin, Ohio, USA                                          |
|                                                        | Hospital for Sick Children, Toronto, Ontario, Canada                |
|                                                        | Mayo Clinic Laboratory, Rochester, Minnesota, USA                   |
|                                                        | ARUP Laboratories, Salt Lake City, Utah, USA                        |
|                                                        | Toronto General Hospital, Toronto, Ontario, Canada                  |
|                                                        | Tufts Medical Center, Boston, Massachusetts, USA                    |
|                                                        | Lexington Medical Laboratories, West Columbia, South Carolina, USA  |
|                                                        | Exsera BioLabs, Denver, Colorado, USA                               |
|                                                        | Mitogen Advanced Diagnostics Laboratories, Calgary, Alberta, Canada |
|                                                        | University of Washington Med Ctr, Seattle, Washington, USA          |
|                                                        | KSL Diagnostics, Inc, Buffalo, New York, USA                        |
|                                                        | Beutner Laboratories, Buffalo, New York, USA                        |
|                                                        | Virginia Mason Medical Center, Seattle, Washington, USA             |
|                                                        | Johns Hopkins University, Baltimore, Maryland, USA                  |
| UNC Hospitals, Chapel Hill, North Carolina, USA        |                                                                     |
| <b><i>In vitro</i> Diagnostics Manufacturers (IVD)</b> | AESKU Diagnostics, Wendelsheim, Germany                             |
|                                                        | Bio-Rad, Benicia, California, USA                                   |
|                                                        | Euroimmun, Mountain Lakes, New Jersey, USA                          |
|                                                        | Immuno Concepts, California, USA                                    |
|                                                        | Inova, San Diego, California, USA                                   |
|                                                        | Scimedx, Dover, New Jersey, USA                                     |
|                                                        | Thermo Fisher, Freiburg, Germany                                    |
|                                                        | Zeus Scientific, Branchburg, New Jersey, USA                        |
