# Supplementary material for: The antinuclear antibody HEp-2 indirect immunofluorescence assay: a survey of laboratory performance, pattern recognition and interpretation
Source: Springer Nature journal article supplement (doi:10.1186/s13317-020-00146-w), 2021-02-27
Supplement: MOESM2 [file 18911112]

## Additional File 2. Accuracy of HEp-2 IFA Pattern Classification based on Type Classification Nomenclatures

### A. Accuracy of Classification based on HEp-2 IFA Group Category

| Organization Type | Observations | Accuracy (%) | 95% CI | p-value |
|-------------------|--------------|--------------|--------|---------|
| CL                | 192          | 91           | 86-94  | 0.07    |
| IVD               | 96           | 97           | 91-99  |         |
| Overall           | 276          | 93           | 89-96  |         |
| CL*               | 93           | 94           | 89-99  | 0.28    |
| IVD               | 96           | 97           | 93-100 |         |
| CL**              | 87           | 89           | 82-95  |         |
| CL* and IVD       | 189          | 95           | 92-98  | 0.04    |

HEp-2 IFA patterns were evaluated by the two organization types: *in vitro* diagnostics manufacturers (IVD) and clinical laboratories (CL). IFA: indirect immunofluorescence assay, CL: all laboratories, CL\*: laboratories that report all 3 group categories, and CL\*\*: laboratories that do not report all 3 group categories.

### B. Accuracy of HEp-2 IFA Pattern Classification based on Traditional and ICAP Nomenclatures

| Organization Type | Nomenclature    |            | Overall (%) |
|-------------------|-----------------|------------|-------------|
|                   | Traditional (%) | ICAP (%)   |             |
| CL                | 83 (78-88)      | 66 (58-73) | 75 (70-80)  |
| IVD               | 93 (91-97)      | 86 (80-92) | 90 (85-93)  |
| Overall           | 87 (82-90)      | 74 (68-79) | 81 (77-84)  |

The table shows the accuracy according to two different groups of raters (CL: clinical laboratories, IVD: *in vitro* diagnostics manufacturers), and two nomenclature systems (traditional, and ICAP: International Consensus on Antinuclear Antibody Patterns); IFA, indirect immunofluorescence assay.
